# Supplementary material for: Characteristics and outcomes of patients enrolled in the Connect 360 benralizumab patient support programme in the UK: a retrospective cohort study
Source: PubMed Central journal article supplement — BMJ Open Respir Res. 2024 Jan 23;11(1):e001734. doi: 10.1136/bmjresp-2023-001734 (PMC10824014; doi:10.1136/bmjresp-2023-001734), 2024-01-23
Supplement: bmjresp-2023-001734supp001.pdf [file bmjresp-2023-001734supp001.pdf]

## Supplementary Figures and tables

Figure S1. Study design

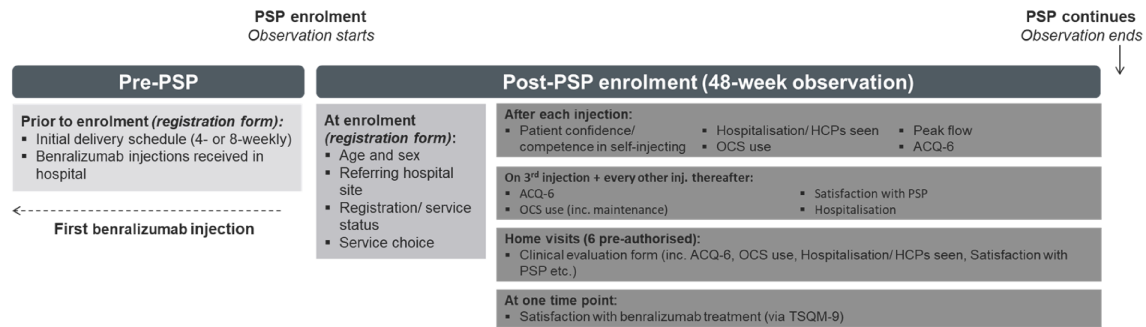

ACQ-6, Asthma Control Questionnaire – 6-item; HCP, healthcare professional; OCS, oral corticosteroid; PSP, patient support programme, TSQM-9, Treatment Satisfaction Questionnaire for Medication– 9-item

Figure S2. Discontinuation of benralizumab post-enrolment

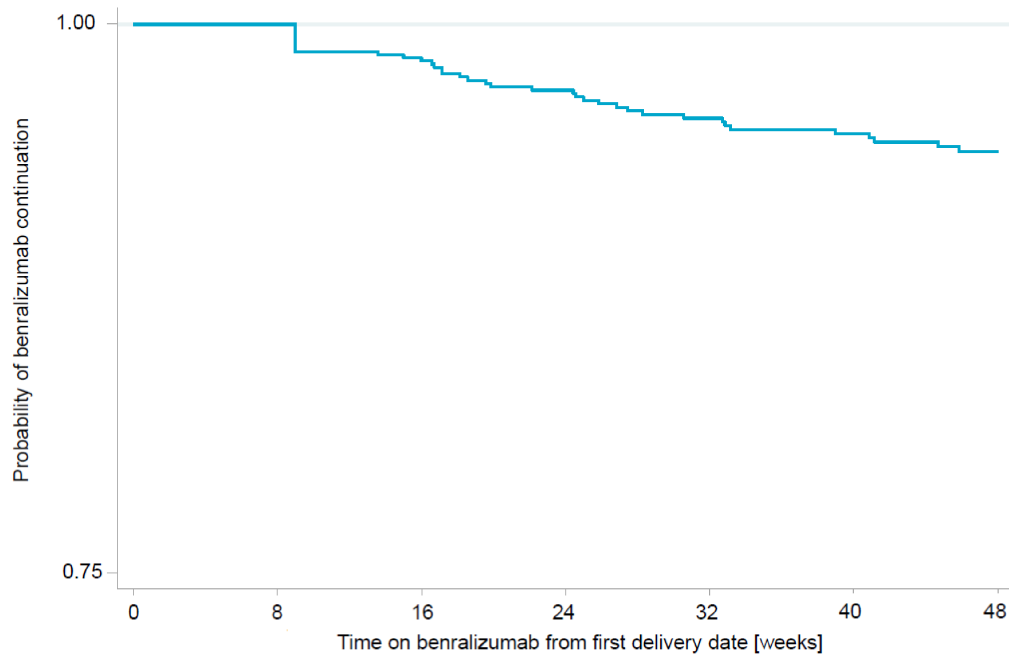

**Supplementary Table 1. Sub-cohorts of patients based on combinations of nurse interactions post-PSP enrolment**

| <b>Patients with data available from each source, n (%)</b> | <b>Baseline (0–4 weeks)</b>  | <b>24 weeks (20–28 weeks)</b> | <b>48 weeks (40–56 weeks)</b> |
|-------------------------------------------------------------|------------------------------|-------------------------------|-------------------------------|
| Registration form                                           | 746 (100)                    | -                             | -                             |
| Adherence check call                                        | 7 (0.9)                      | 98 (13.1)                     | 88 (11.8)                     |
| Nurse visit form                                            | 152 (20.4)                   | 12 (1.6)                      | 6 (0.8)                       |
| Ongoing/injection 3 call                                    | 45 (6.0)                     | 152 (20.4)                    | 257 (34.5)                    |
| Clinical cohort <sup>a</sup>                                | 186 (24.9)                   | 231 (31.0)                    | 302 (40.5)                    |
|                                                             | <b>Baseline AND 24 weeks</b> | <b>24 AND 48 weeks</b>        | <b>Baseline AND 48 weeks</b>  |
| Clinical cohort <sup>a</sup>                                | 69 (9.3)                     | 126 (16.9)                    | 56 (7.5)                      |
|                                                             | <b>Baseline TO 24 weeks</b>  | <b>-</b>                      | <b>Baseline TO 48 weeks</b>   |
| Adherence cohort <sup>b</sup>                               | 297 (39.8)                   | -                             | 198 (26.5)                    |
| Persistence cohort <sup>c</sup>                             | 643 (86.2)                   | -                             | 443 (59.4)                    |
| Remain within PSP                                           | 643 (86.2)                   | -                             | 443 (59.4)                    |

<sup>a</sup>Clinical cohort: Adherence check call OR nurse visit form OR ongoing/injection 3 call OR ACQ-6 call

<sup>b</sup>Adherence cohort: Adherence check call OR nurse visit form AND remain within PSP

<sup>c</sup>Persistence cohort: Adherence check call OR nurse visit form OR sales/delivery data AND remain within PSP  
ACQ-6, Asthma Control Questionnaire – 6-item; PSP, Patient support programme
